# Supplementary material for: Gene-Regulatory Potential of 25-Hydroxyvitamin D3 and D2
Source: PubMed Central journal article supplement (PMC9330572; doi:10.3389/fnut.2022.910601), 2022-07-13

**Fig. S3**

**A**

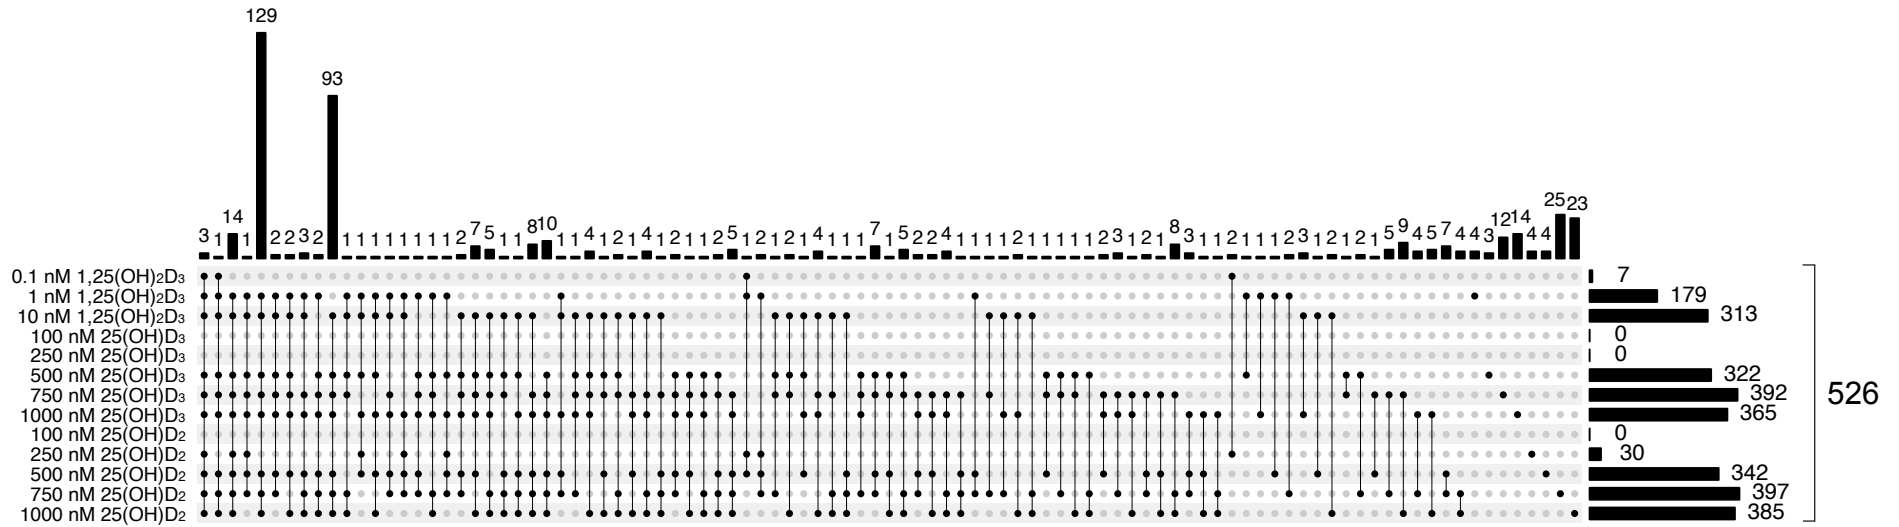

**B**

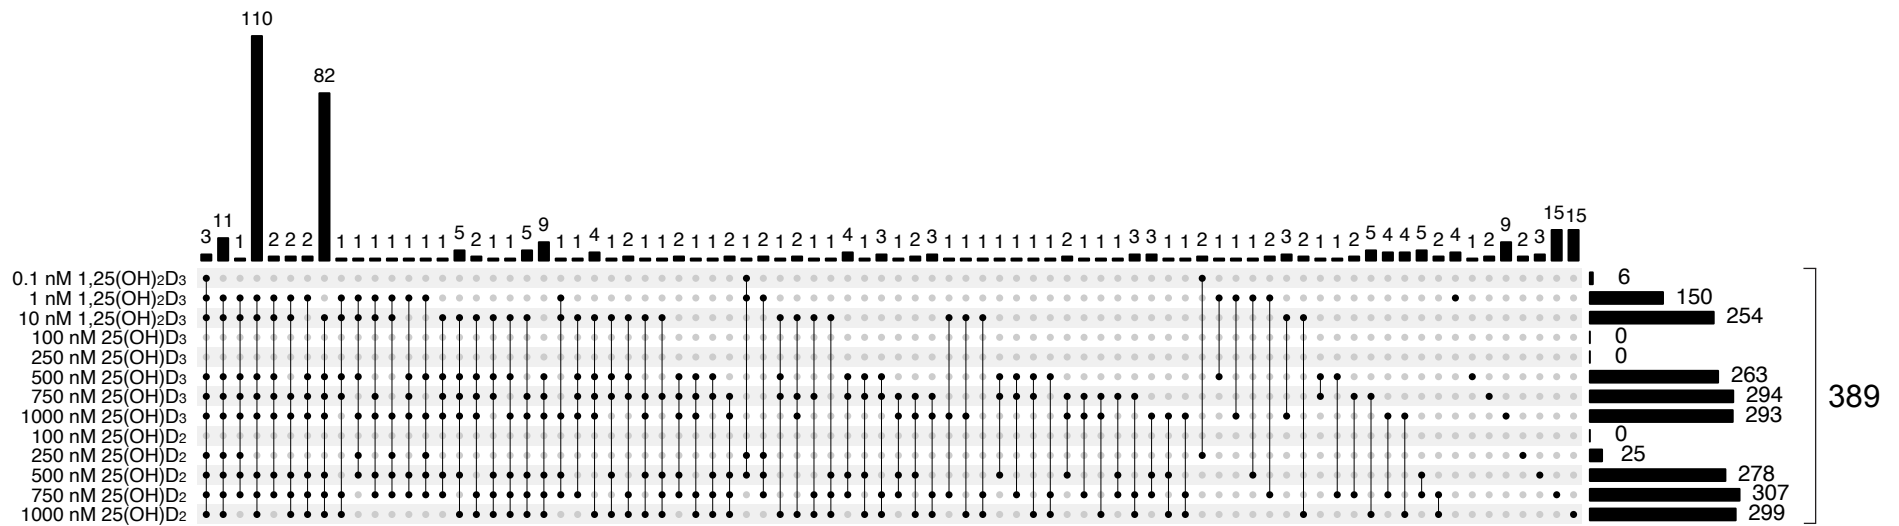

Supplement: Image_3.pdf [file Image_3.pdf]
