# Supplementary material for: Gene-Regulatory Potential of 25-Hydroxyvitamin D3 and D2
Source: PubMed Central journal article supplement (PMC9330572; doi:10.3389/fnut.2022.910601), 2022-07-13

**Fig. S4**

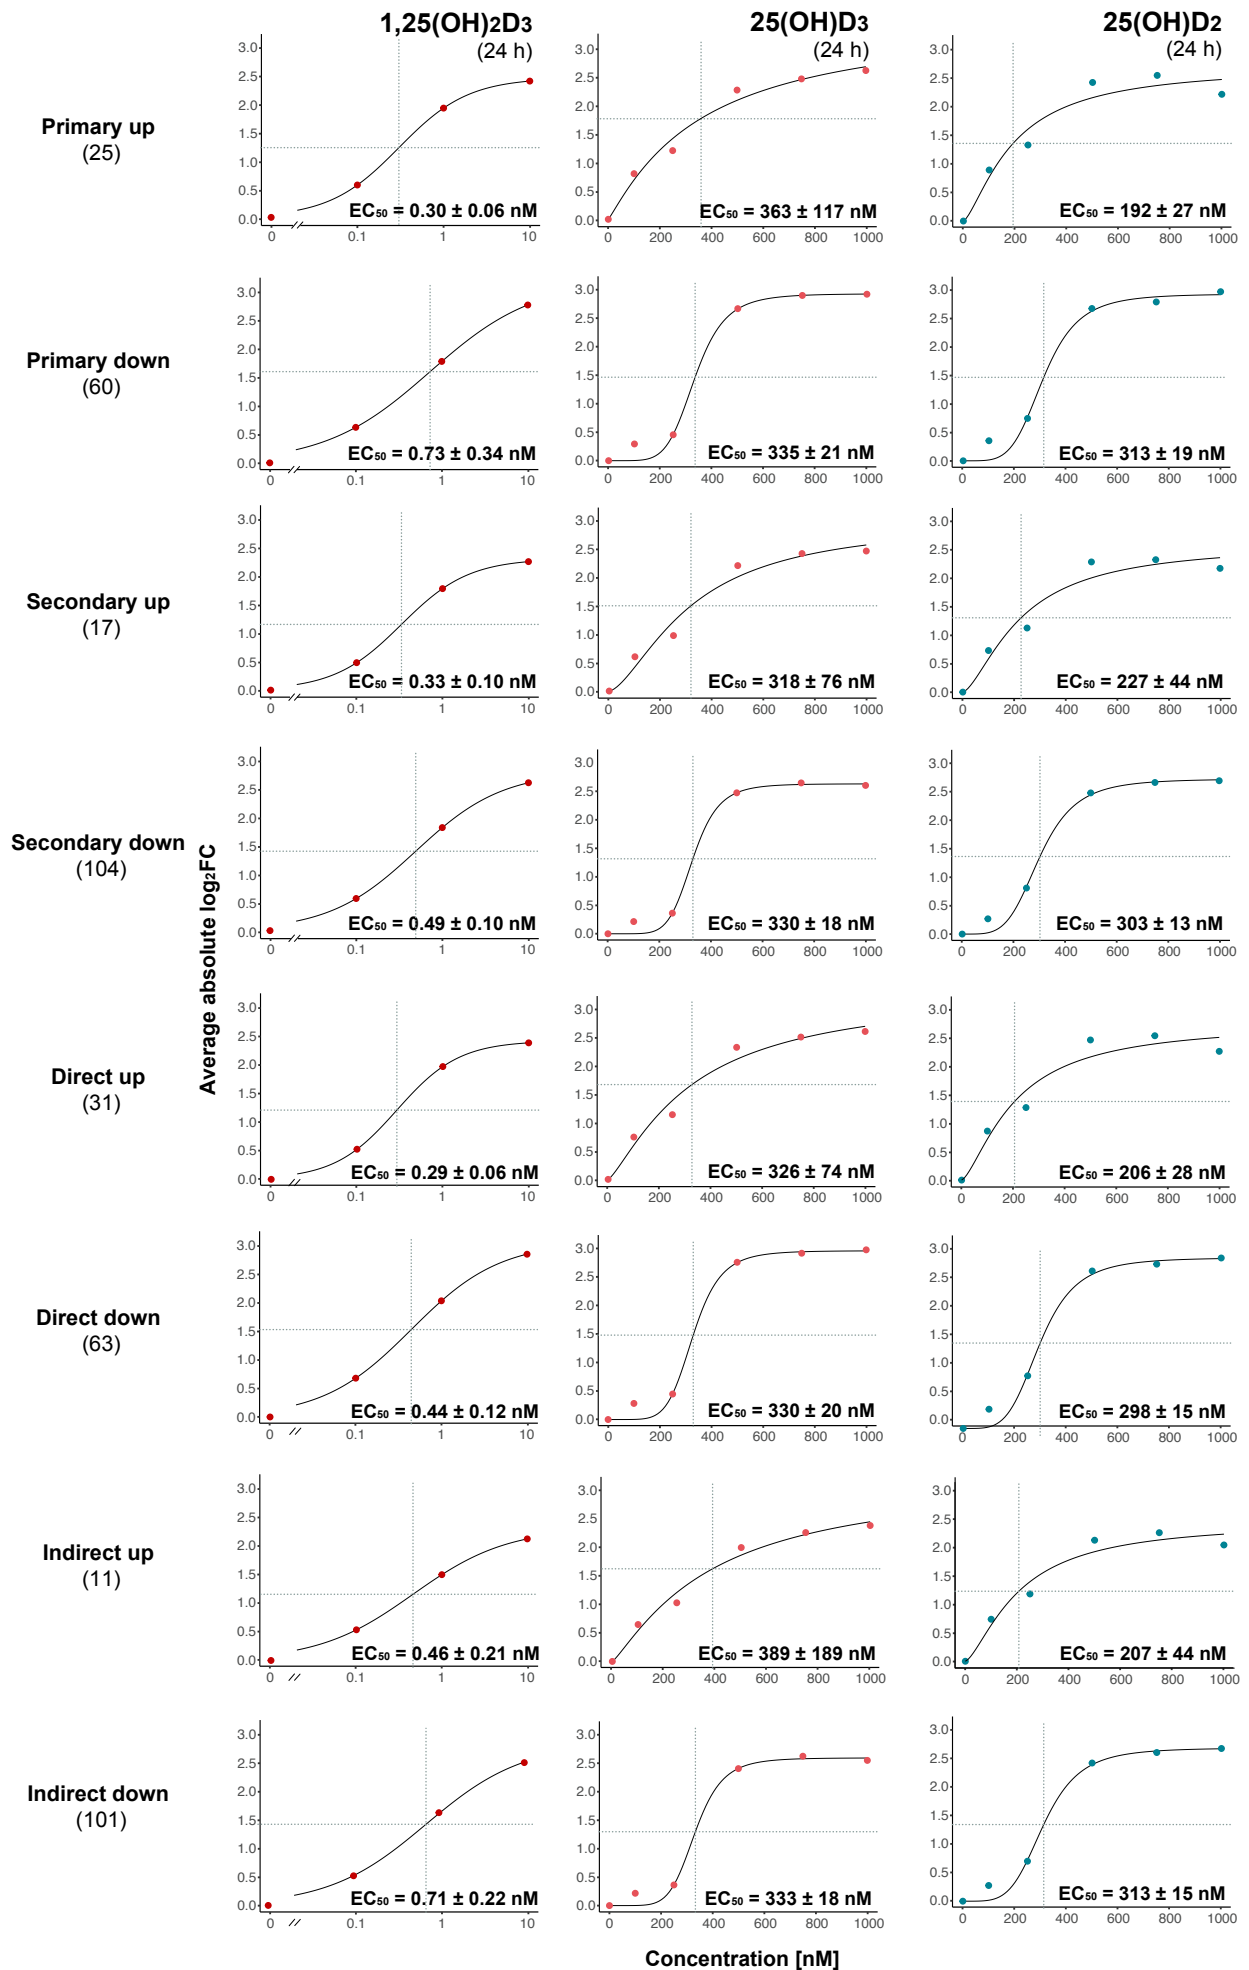

Supplement: Image_4.pdf [file Image_4.pdf]
