# Supplementary material for: Gene-Regulatory Potential of 25-Hydroxyvitamin D3 and D2
Source: PubMed Central journal article supplement (PMC9330572; doi:10.3389/fnut.2022.910601), 2022-07-13

Fig. S6

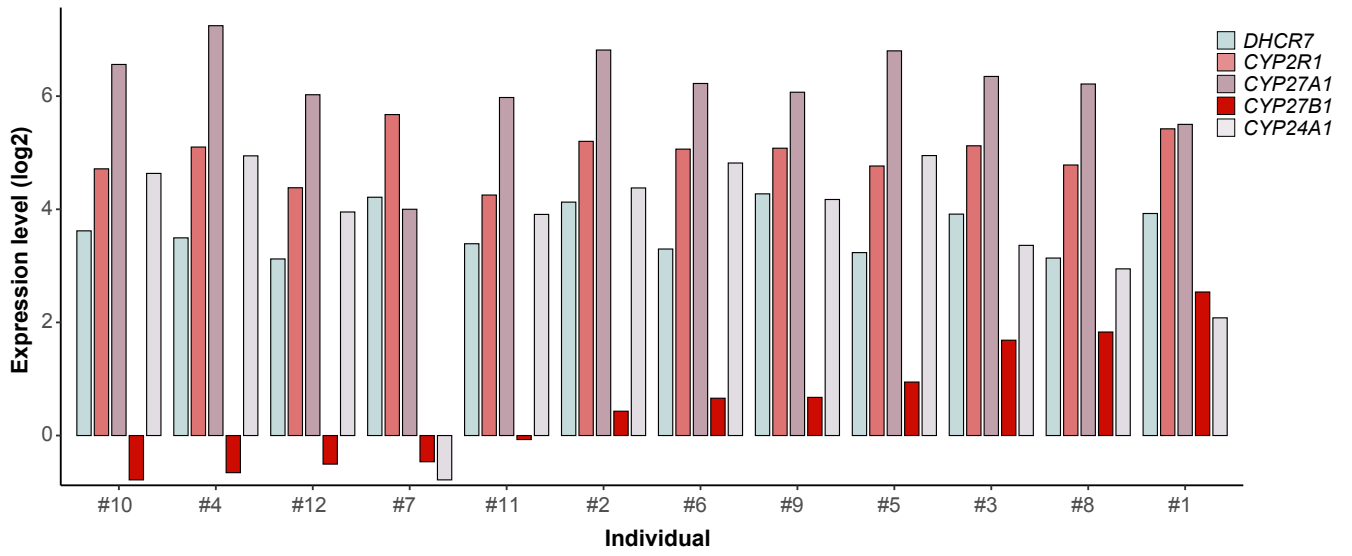

Supplement: Image_6.pdf [file Image_6.pdf]
